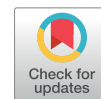

# Erratum

**Erratum. Changes in Screening Practices for Prediabetes and Diabetes Since the Recommendation for Hemoglobin A<sub>1c</sub> Testing. Diabetes Care 2019;42: 576–584**

*Joshua M. Evron, William H. Herman, and  
Laura N. McEwen*

<https://doi.org/10.2337/dc20-er09>

Acknowledgment of funding support was inadvertently omitted from the above-mentioned article. The following information is added:

**Funding.** Support was provided by the National Institute of Diabetes and Digestive and Kidney Diseases through grant number P30DK092926 (Michigan Center for Diabetes Translational Research).

The online version of the article (<https://doi.org/10.2337/dc17-1726>) has been updated.
